# Supplementary material for: Synergetic Catalytic Effect between Ni and Co in Bimetallic Phosphide Boosting Hydrogen Evolution Reaction
Source: MDPI journal article supplement (doi:10.3390/nano14100853), 2024-05-14
Supplement: s1 [file s1]

# Synergetic catalytic effect between Ni and Co in bimetallic phosphide boosting hydrogen evolution reaction

Xiaohan Wang <sup># 1,2,3</sup>, Han Tian <sup># 1</sup>, Libo Zhu <sup>1,3</sup>, Shujing Li <sup>2</sup>, Xiangzhi Cui <sup>1,2,3,\*</sup>

<sup>1</sup> Shanghai Institute of Ceramics, Chinese Academy of Sciences, Shanghai 200050, P. R. China.

<sup>2</sup> School of Chemistry and Materials Science, Hangzhou Institute for Advanced Study, University of Chinese Academy of Sciences, Hangzhou 310024, P. R. China.

<sup>3</sup> Center of Materials Science and Optoelectronics Engineering, University of Chinese Academy of Sciences, Beijing 100049, P. R. China.

\* Correspondence: cuixz@mail.sic.ac.cn (X.C.)

<sup>#</sup> These authors contribute equally.

## EXPERIMENTAL SECTION

### Materials Characterization

The measurements were done using a field emission scanning electron microscope (SEM) (FEI Magellan-400, 5 kV). With a 200 kV JEOL JEM-F200 transmission electron microscope using a field-emission electron gun, the transmission electron microscopic (TEM), high-resolution TEM (HRTEM), and associated energy dispersive X-ray spectrometer mapping (EDS-mapping) images were obtained. The Cu K $\alpha$  radiation target (40 kV, 40 mA) was used to get the X-ray diffraction (XRD) patterns from the Rigaku D/Max-2550V X-ray diffractometer at a scan rate of 4 ° min<sup>-1</sup>. Thermo Fisher Scientific ECSA lab 250 XPS spectrometer was used to detect the X-ray photoelectron spectroscopy (XPS) signals using monochromatic Al K $\alpha$  X-rays. The carbon base (284.8 eV) was used for calibration. Optical emission spectroscopy (ICP-OES, Agilent 725) using inductively coupled plasma was used to assess the catalyst's composition and concentration.

### HER products analysis

The Faraday efficiency of the catalyst to produce hydrogen was evaluated using the following equation

$$FE(\%) = \frac{n_e \times V_{(H_2 \text{ production})} \times F}{Q_{\text{total}} \times V_s} \times 100\%$$

$n_e$  is the number of electrons required to produce one molecule of hydrogen ( $n_e = 2$ ),  $F$  is Faraday constant (96485 C mol<sup>-1</sup>),  $Q_{\text{total}}$  is the total number of electrons during the reaction, and  $V_s$  is the standard molar volume (22.4 L mol<sup>-1</sup>).

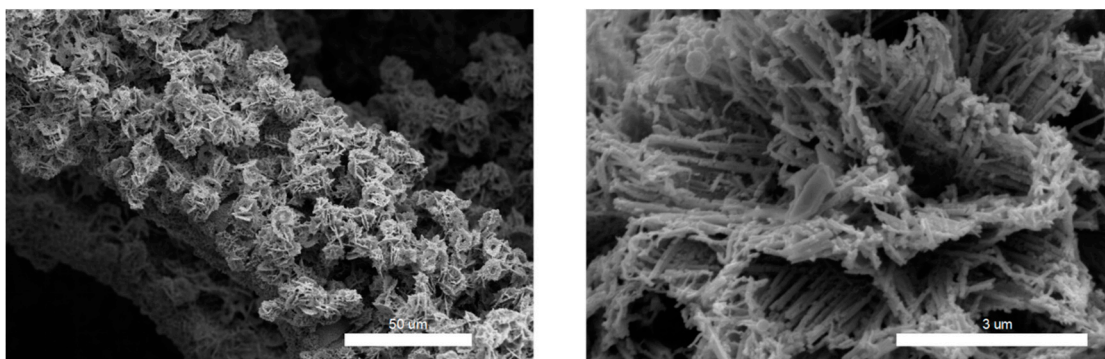

**Figure S1.** Typical SEM images at different magnifications of NiCoP-1/NF.

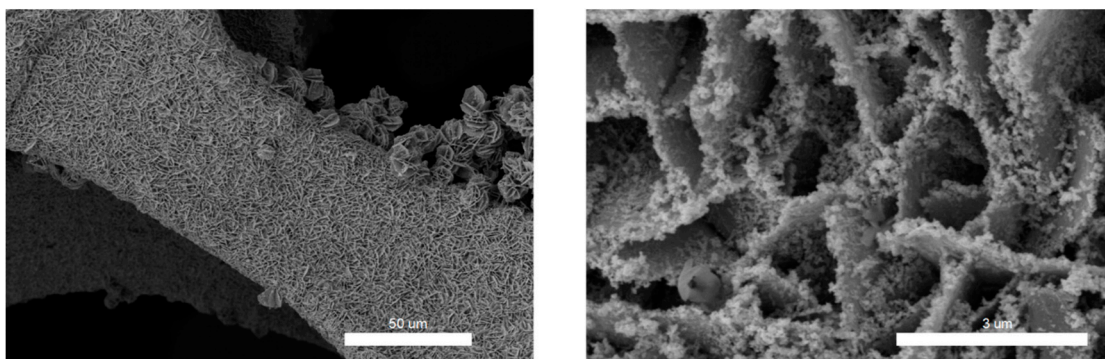

**Figure S2.** Typical SEM images at different magnifications of NiCoP-3/NF.

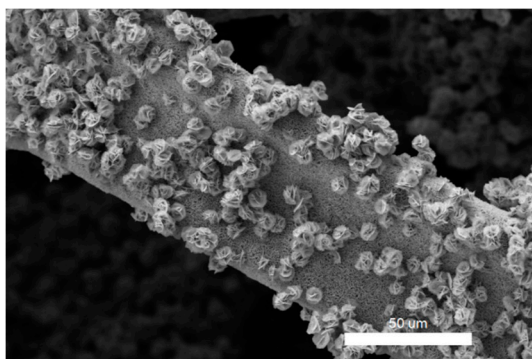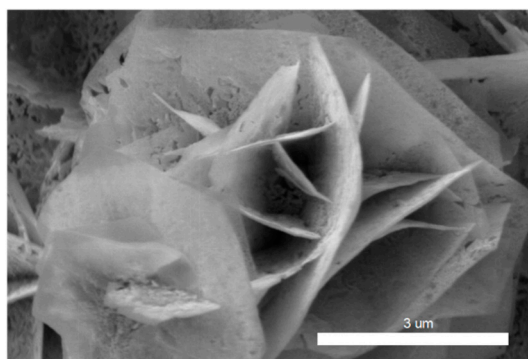

**Figure S3.** Typical SEM images at different magnifications of NiP/NF.

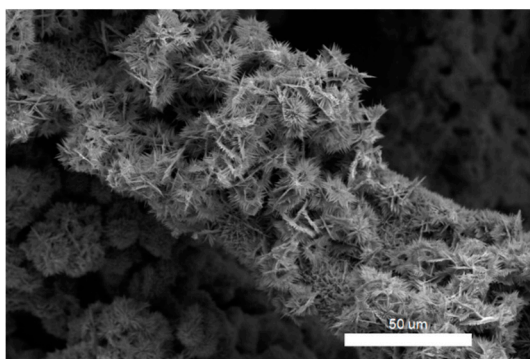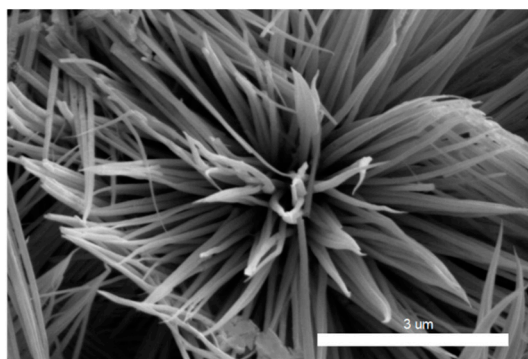

**Figure S4.** Typical SEM images at different magnifications of CoP/NF.

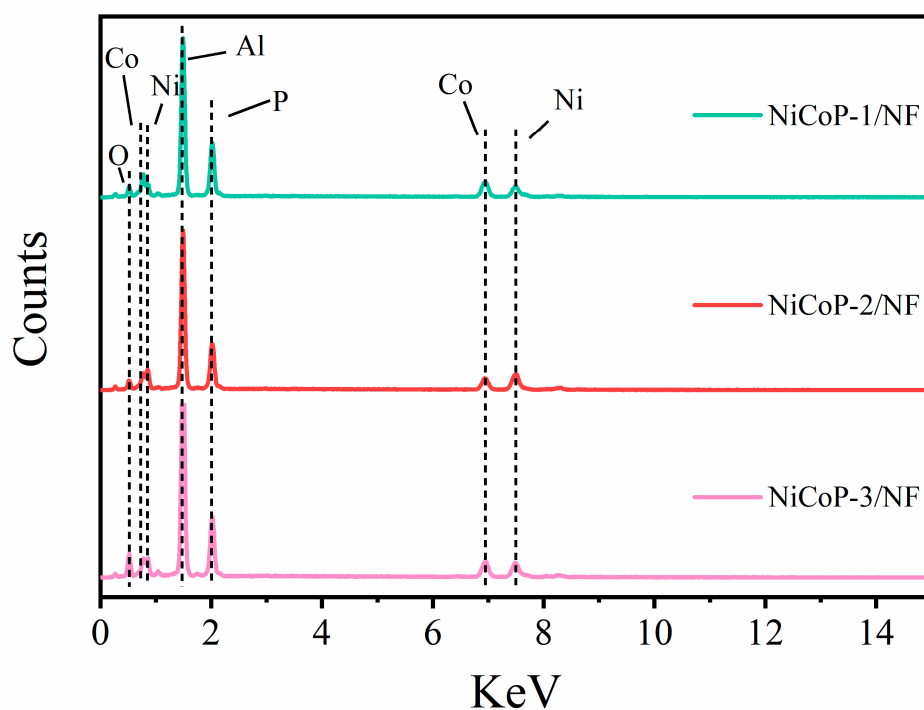

**Figure S5.** SEM-EDS spectra of NiCoP-1/NF, NiCoP-2/NF and NiCoP-3/NF. (The Al signal is derived from the substrate (Al foil) during the testing process)

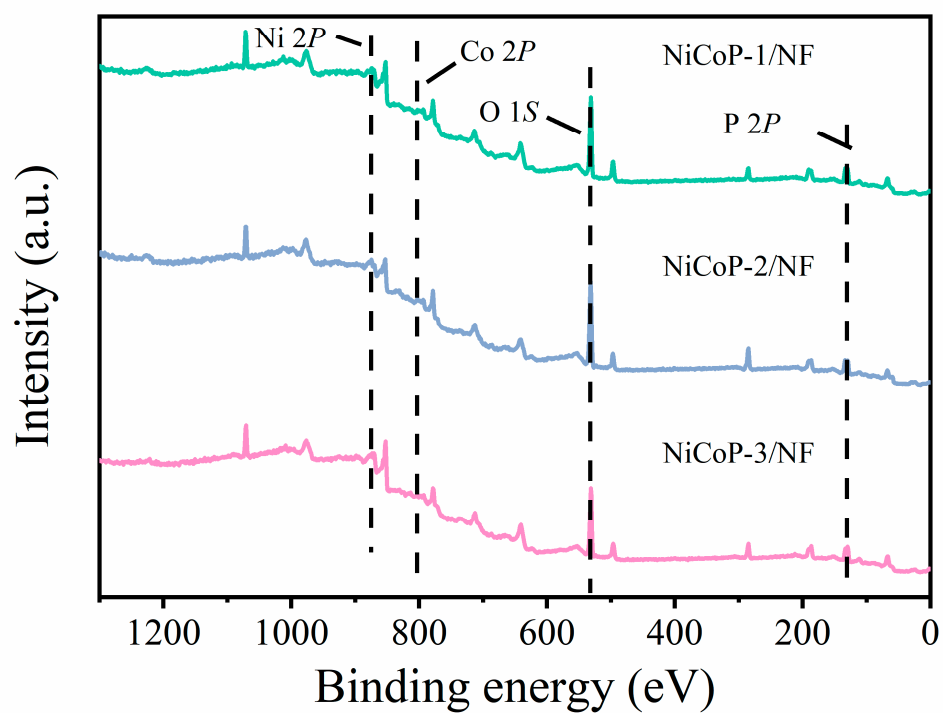

**Figure S6.** Survey scan of XPS spectra of the NiCoP-1/NF, NiCoP-2/NF and NiCoP-3/NF.

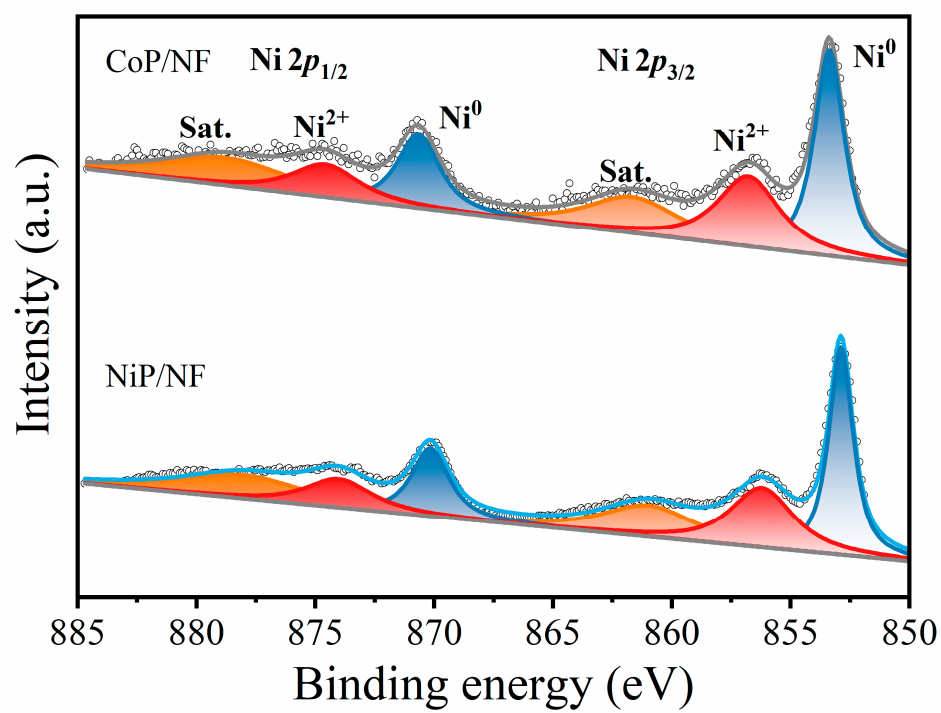

**Figure S7.** High-resolution XPS Ni 2p of CoP/NF and NiP/NF.

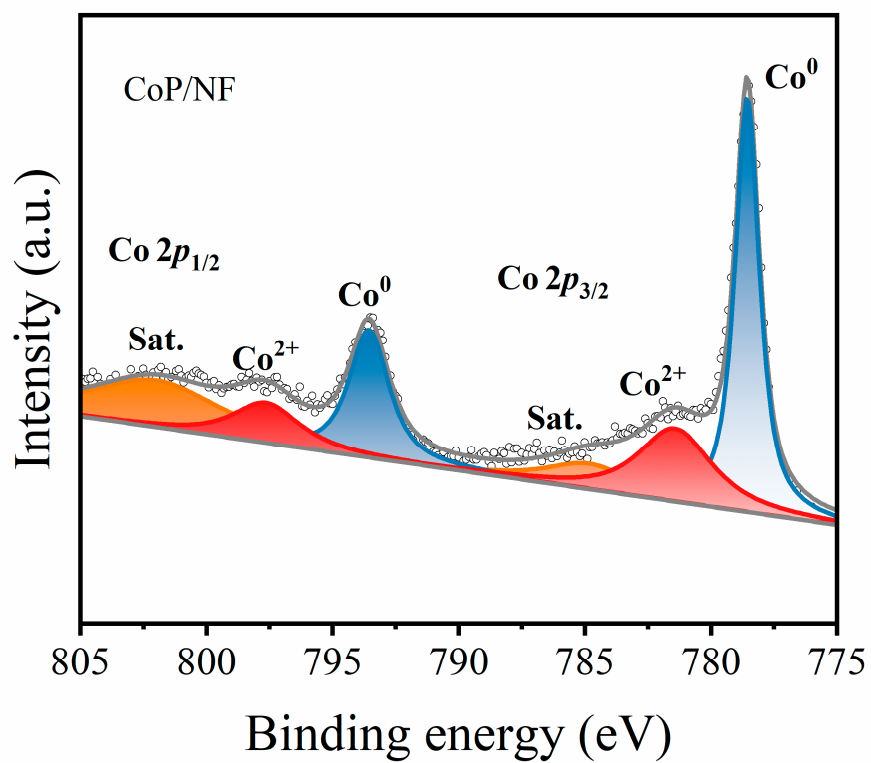

**Figure S8.** High-resolution XPS Co 2p of CoP/NF.

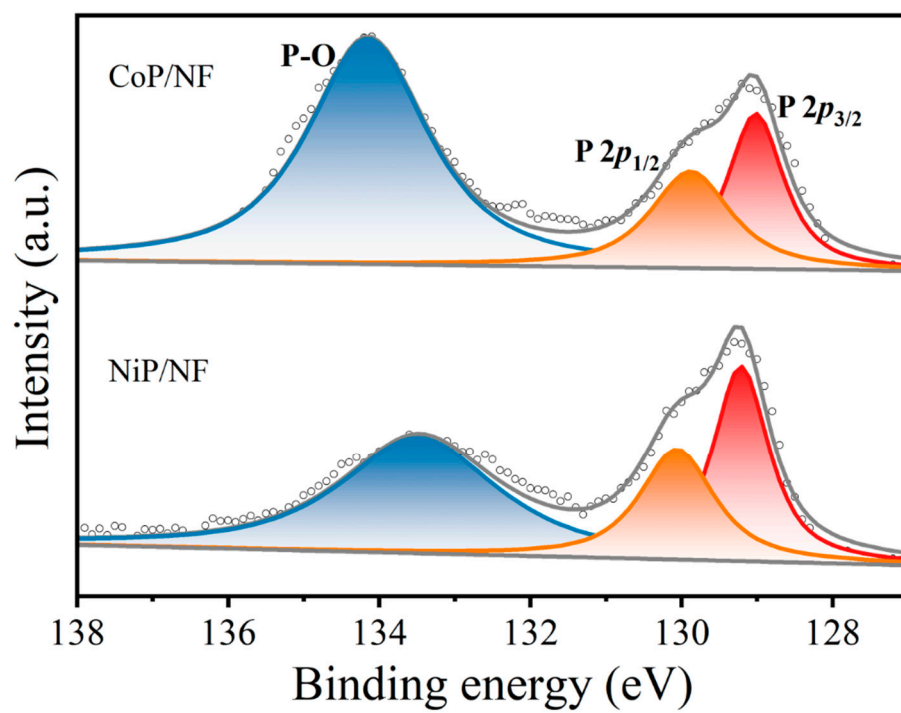

**Figure S9.** High-resolution XPS P 2p of CoP/NF and NiP/NF.

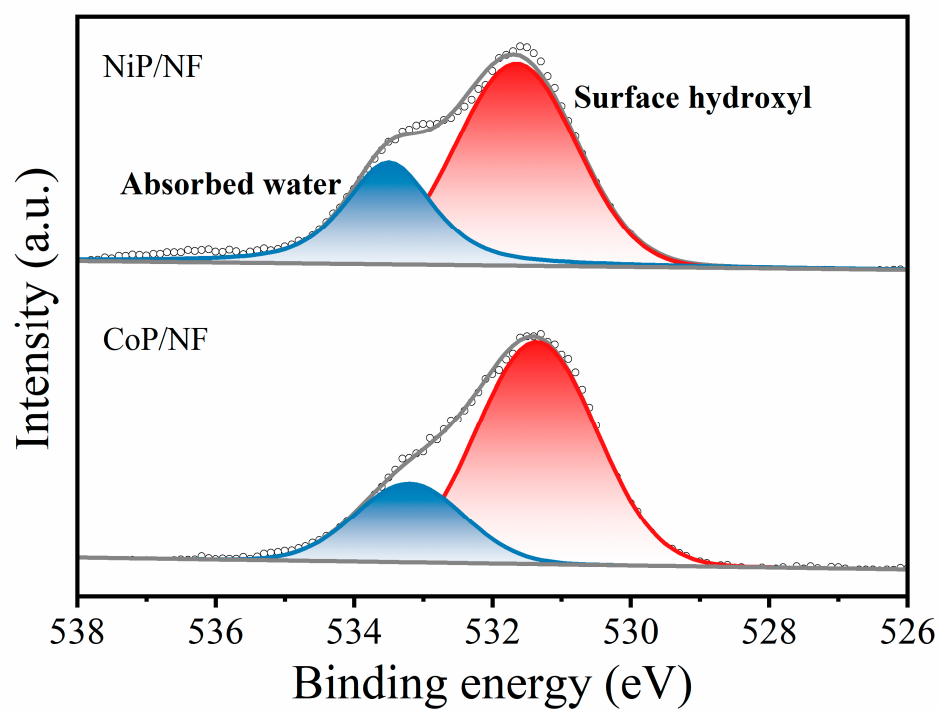

**Figure S10.** High-resolution XPS O 1s of NiP/NF and CoP/NF.

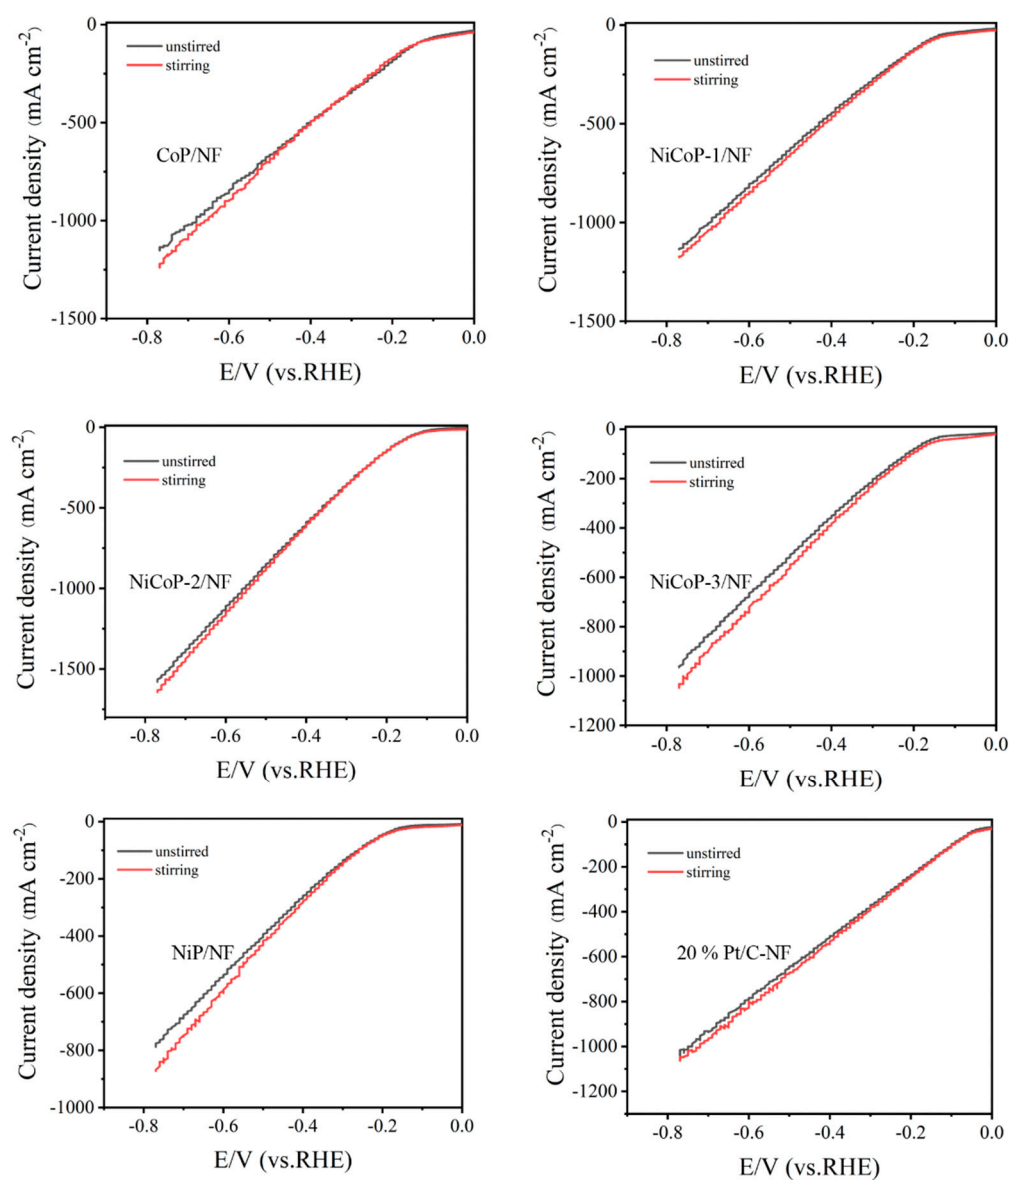

**Figure S11.** LSV curves of as-prepared catalysts with/without stirring in HER.

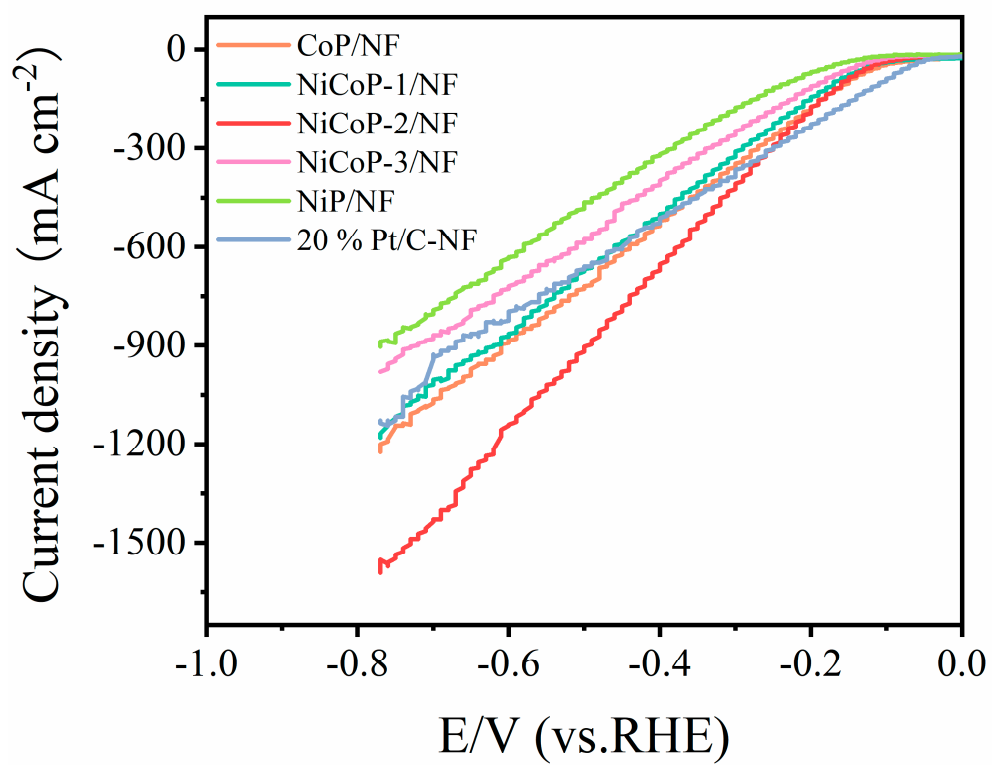

**Figure S12.** The LSV curves without iR compensation in 1 M KOH.

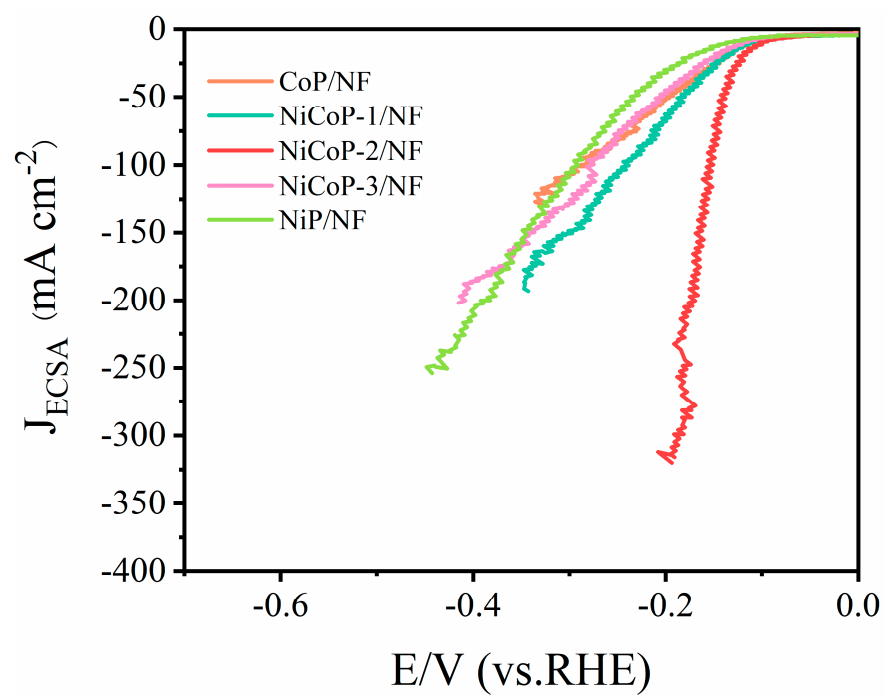

**Figure S13.** LSV curves after normalization of ECSA values.

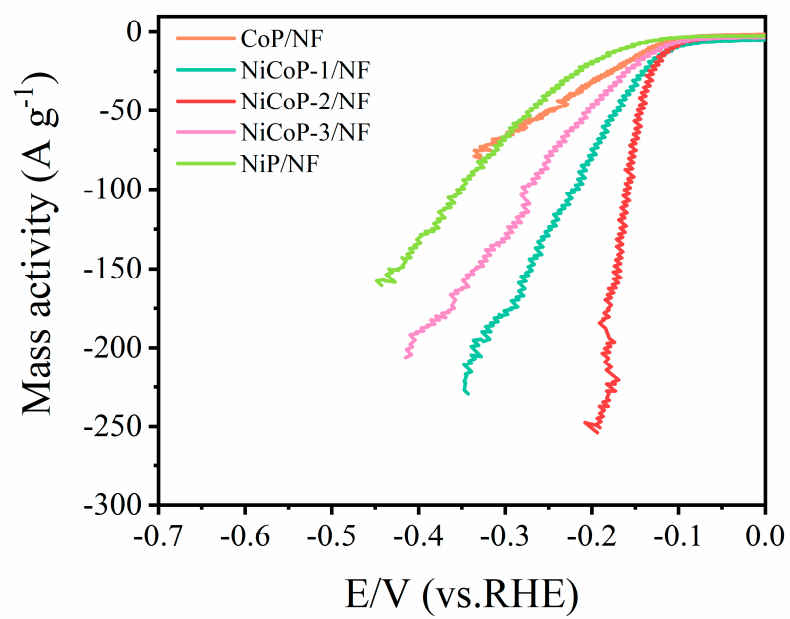

**Figure S14.** The mass activity curves of as-prepared catalysts for HER.

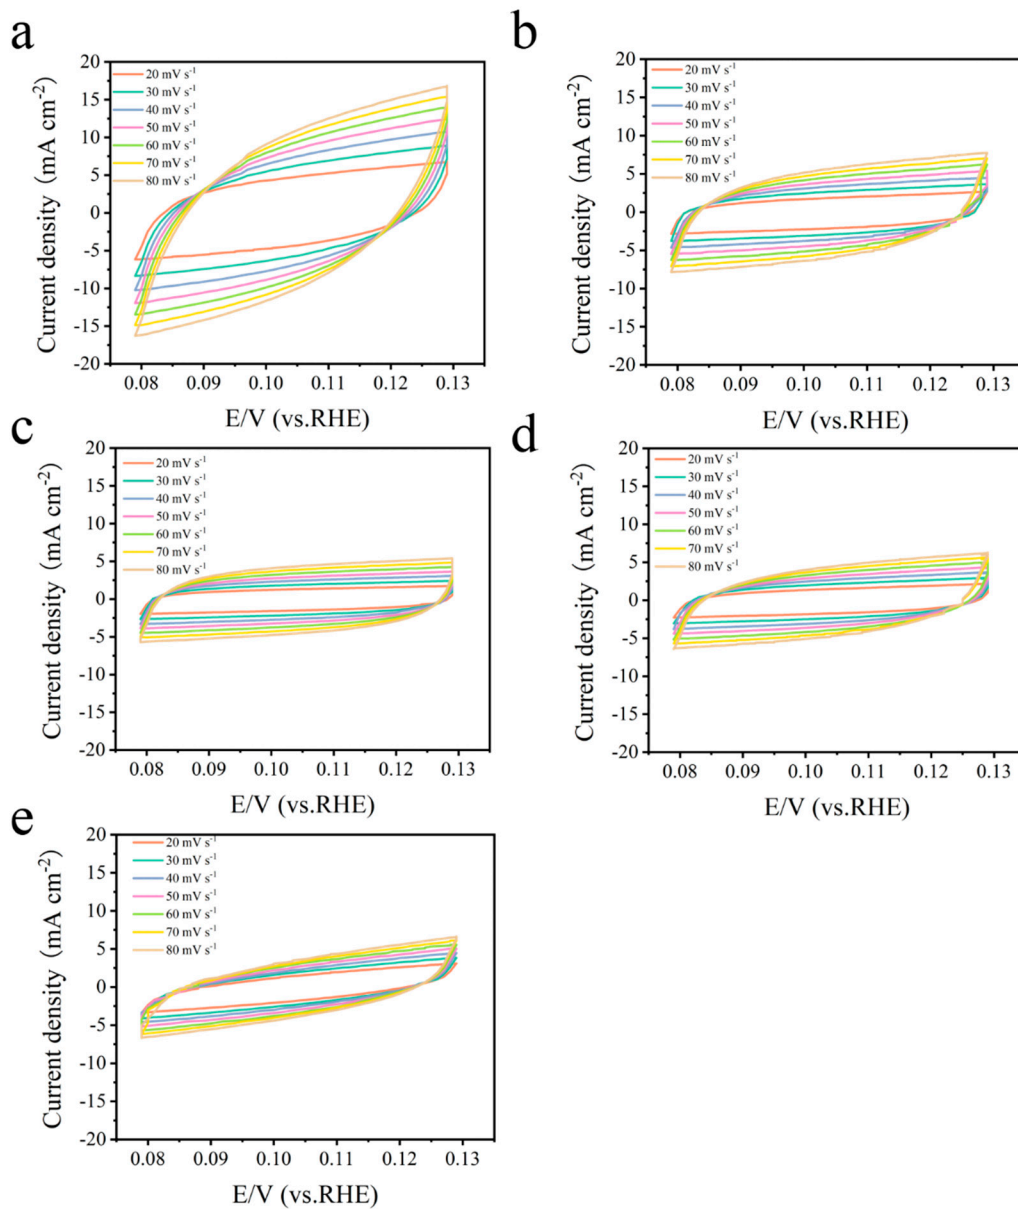

**Figure S15.** The CV curves of varied samples with the scan rate ranging from 20 to 80  $\text{mV s}^{-1}$  in 1.0 M KOH; (a) CoP/NF; (b) NiCoP-1/NF; (c) NiCoP-2/NF; (d) NiCoP-3/NF; (e) NiP/NF.

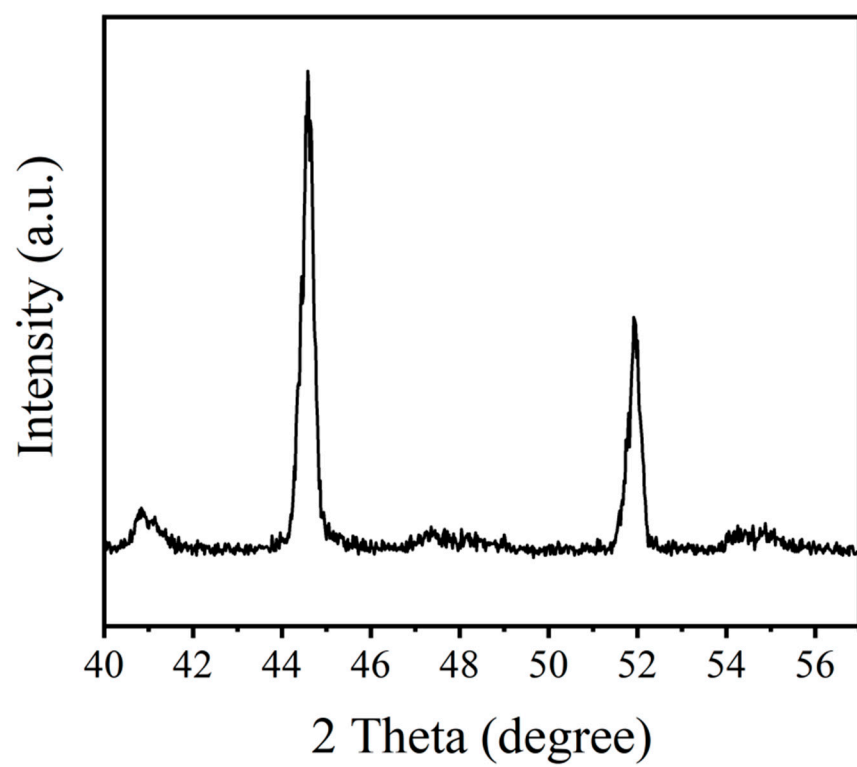

**Figure S16.** XRD patterns for NiCoP-2/NF after the stability tests.

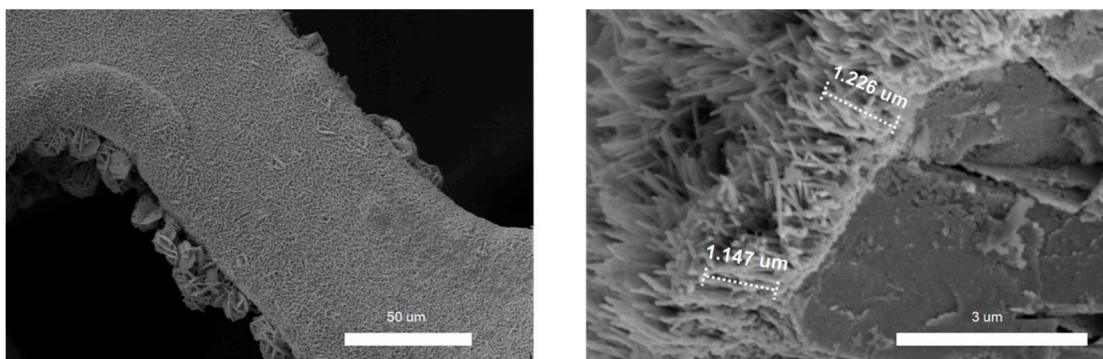

**Figure S17.** SEM image of NiCoP-2/NF after the stability tests.

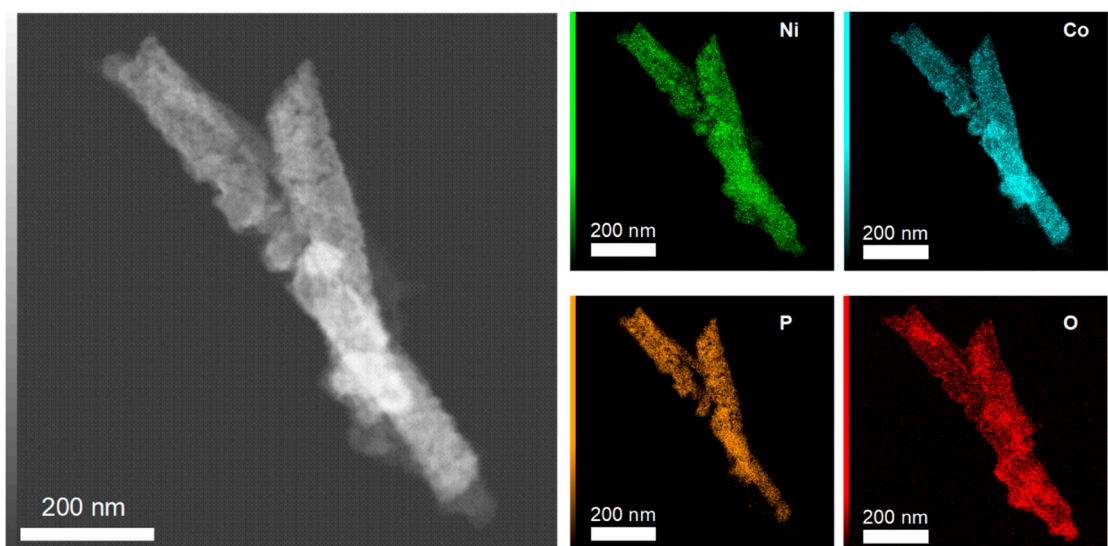

**Figure S18.** TEM image and EDS elemental mappings of NiCoP-2/NF after the stability tests.

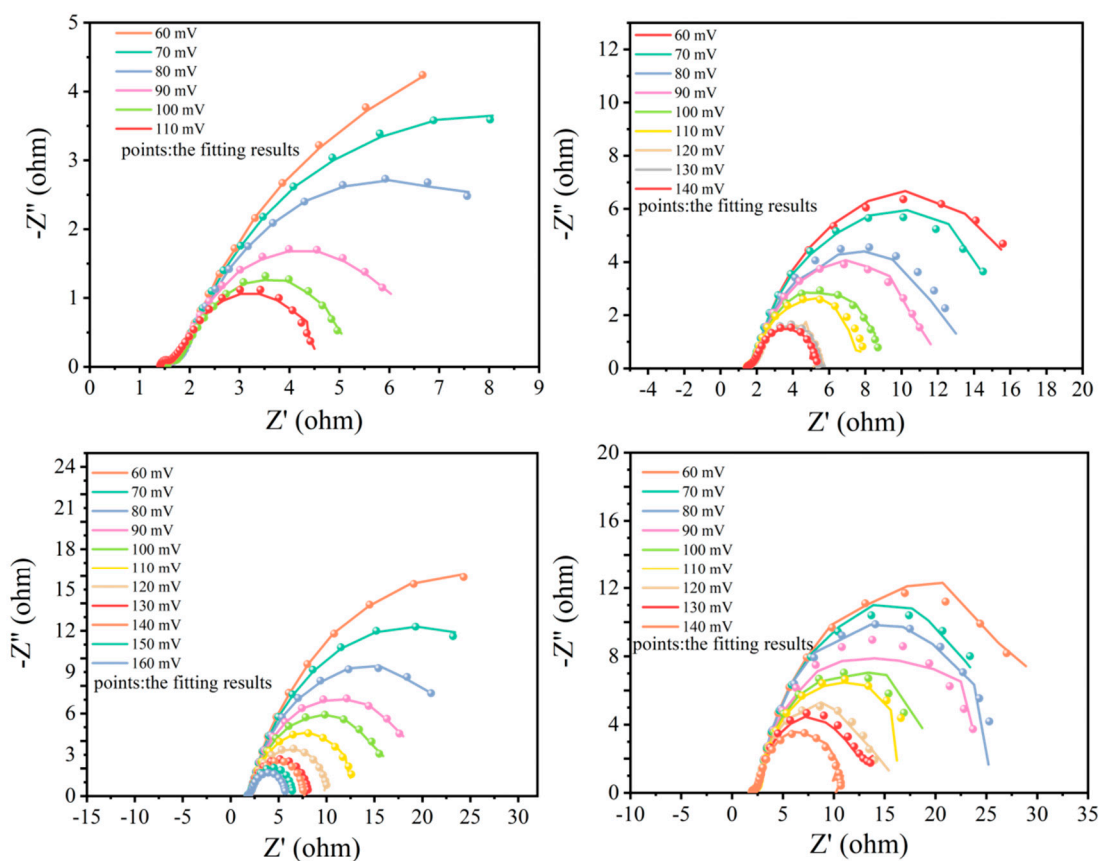

**Figure S19.** Nyquist plots of (a) CoP/NF, (b) NiCoP-1/NF, (c) NiCoP-3/NF and (d) NiP/NF for HER at varied potentials (lines and points represent the original data and fitted data, respectively).

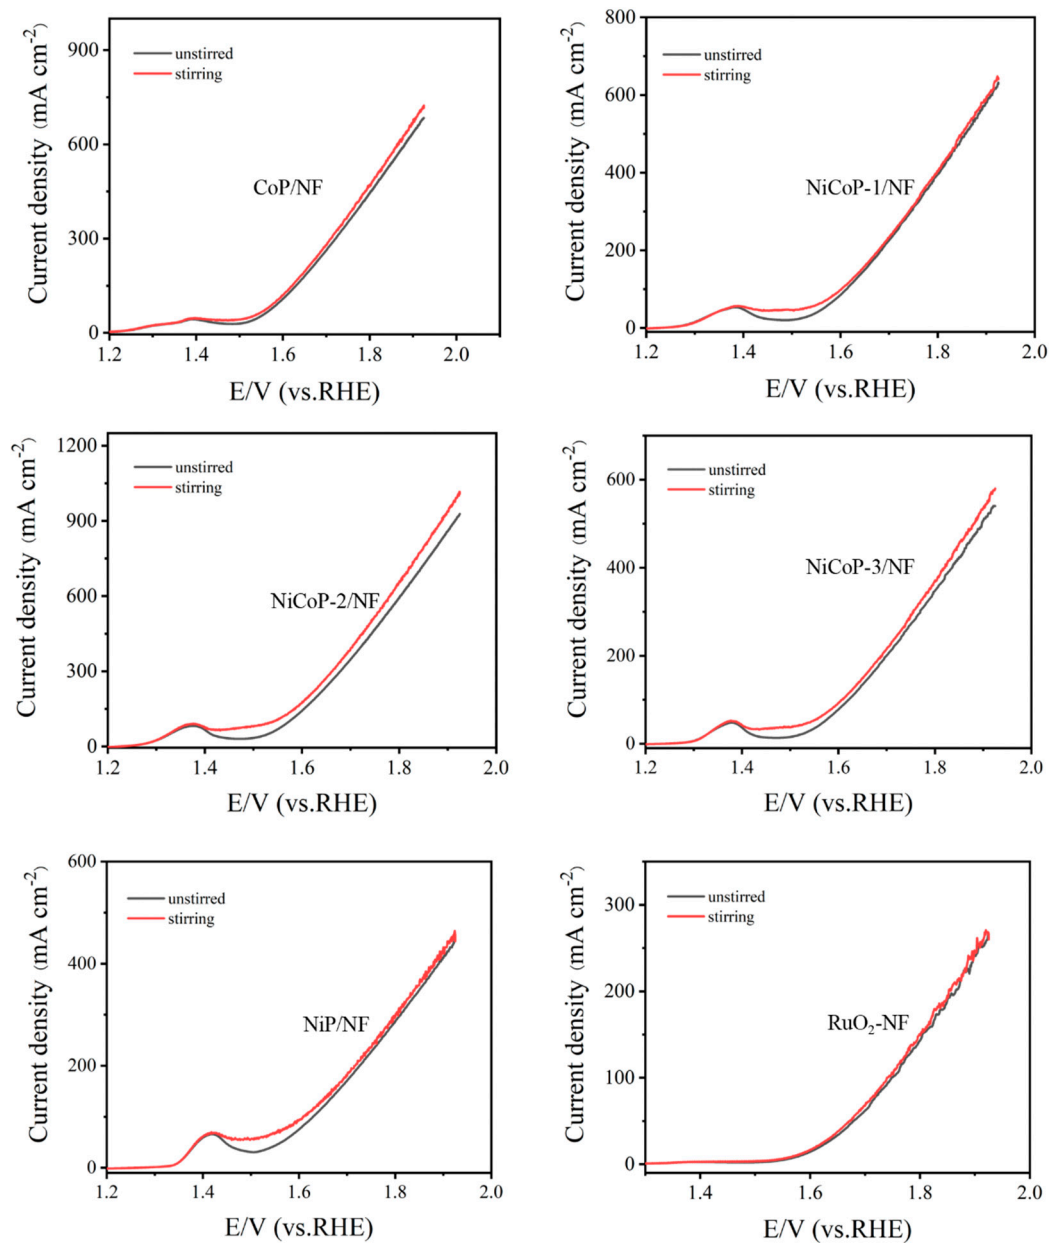

**Figure S20.** LSV curves of as-prepared catalysts with/without stirring in OER.

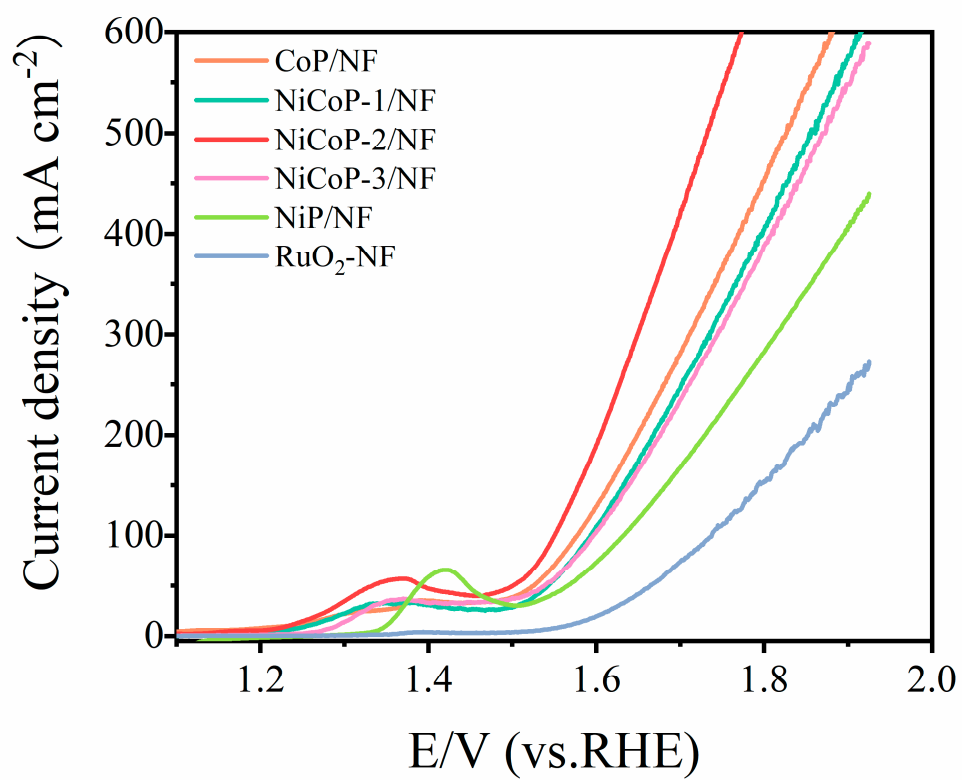

**Figure S21.** LSV curves (without iR correction) of as-prepared catalysts for OER by using Hg/HgO as reference electrode.

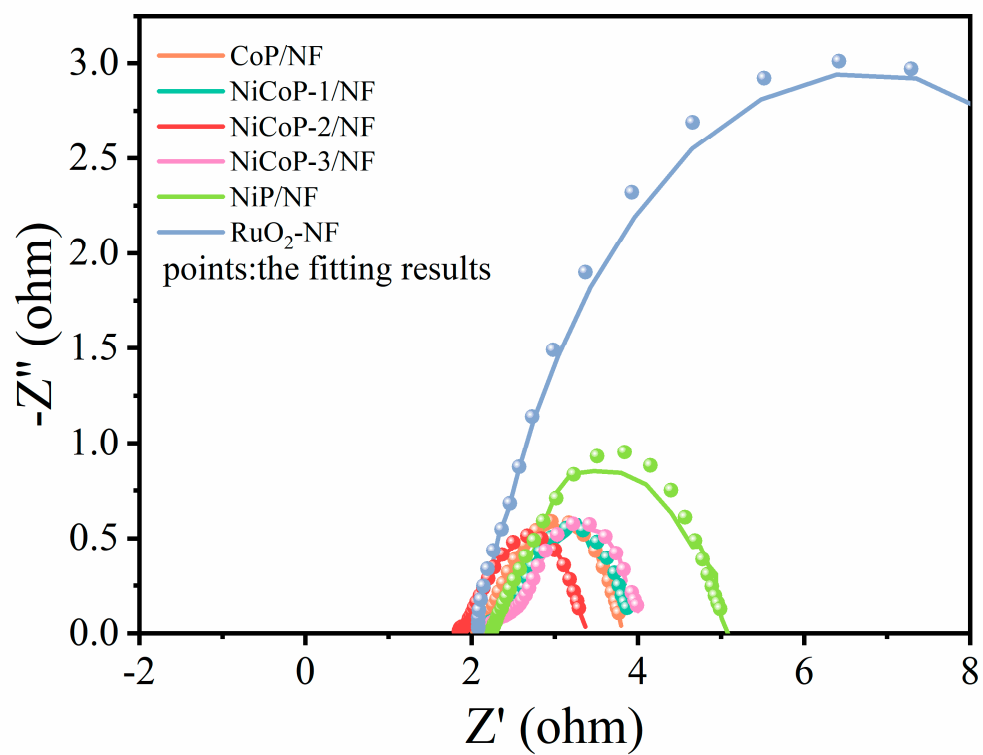

**Figure S22.** The Nyquist plots of as-prepared catalysts and commercial RuO<sub>2</sub>-NF measured in OER conditions (lines and points represent the original and fitted data, respectively).

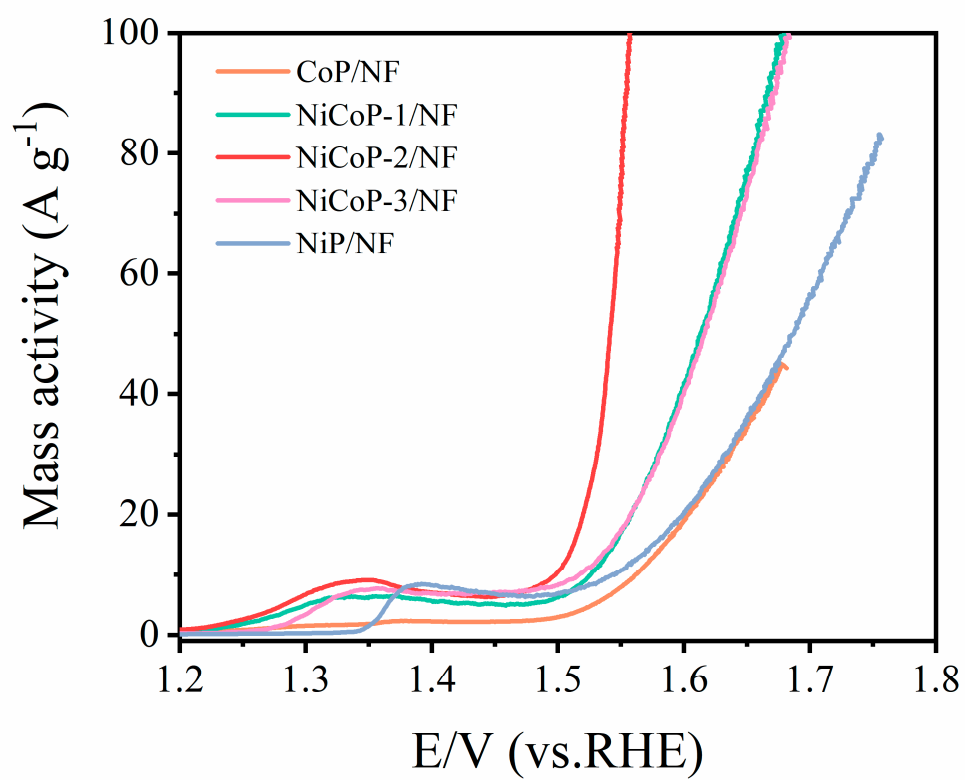

**Figure S23.** The mass activity curves of as-prepared catalysts for OER.

**Table S1.** Mass loading during the preparation of different catalysts.

| <b>Samples</b>       | <b>Weight of substrate (NF)</b> | <b>Weight after preparation</b> | <b>Mass loading</b>       |
|----------------------|---------------------------------|---------------------------------|---------------------------|
| CoP/NF               | 0.2081 g                        | 0.3145 g                        | 15.2 mg cm <sup>-2</sup>  |
| NiCoP-1/NF           | 0.2031 g                        | 0.2391 g                        | 5.143 mg cm <sup>-2</sup> |
| NiCoP-2/NF           | 0.2033 g                        | 0.2472 g                        | 6.271 mg cm <sup>-2</sup> |
| NiCoP-3/NF           | 0.2047 g                        | 0.2380 g                        | 4.757 mg cm <sup>-2</sup> |
| NiP/NF               | 0.2009 g                        | 0.2403 g                        | 5.629 mg cm <sup>-2</sup> |
| 20 % Pt/C-NF         | -                               | -                               | 1 mg cm <sup>-2</sup>     |
| RuO <sub>2</sub> -NF | -                               | -                               | 1 mg cm <sup>-2</sup>     |

**Table S2.** The corresponding mass and atomic percentages in SEM-EDS spectra of NiCoP-1/NF, NiCoP-2/NF and NiCoP-3/NF.

| <b>Samples</b> | <b>Element</b> | <b>Weight%</b> | <b>Atom%</b> |
|----------------|----------------|----------------|--------------|
| NiCoP-1/NF     | O              | 6.9            | 14.0         |
|                | Al             | 39.0           | 46.7         |
|                | P              | 19.7           | 20.5         |
|                | Co             | 19.2           | 10.5         |
|                | Ni             | 15.1           | 8.3          |
| NiCoP-2/NF     | O              | 12.5           | 23.7         |
|                | Al             | 36.9           | 41.7         |
|                | P              | 18.1           | 17.8         |
|                | Co             | 15.8           | 8.2          |
|                | Ni             | 16.7           | 8.7          |
| NiCoP-3/NF     | O              | 6.3            | 13.0         |
|                | Al             | 39.6           | 48.2         |
|                | P              | 17.1           | 18.1         |
|                | Co             | 14.0           | 7.8          |
|                | Ni             | 22.9           | 12.8         |

**Table S3.** Corresponding mass percentages and atomic percentages in TEM-EDS images of NiCoP-2/NF.

| Element | Mass% | Atom% |
|---------|-------|-------|
| C       | 87.66 | 95.07 |
| O       | 2.12  | 1.72  |
| P       | 4.03  | 1.69  |
| Co      | 3.06  | 0.68  |
| Ni      | 2.54  | 0.56  |

**Table S4.** ICP data of Ni-Co-Pre/NF.

| <b>Element</b>           | Ni                        | Co                        |
|--------------------------|---------------------------|---------------------------|
| <b>Weight Percentage</b> | 25.4 wt. %                | 24.5 wt. %                |
| <b>ICP Content</b>       | 253.83 g kg <sup>-1</sup> | 244.79 g kg <sup>-1</sup> |

**Table S5.** ECSA values of as-prepared catalysts.

| <b>Samples</b> | <b>ECSA (cm<sup>2</sup>)</b> |
|----------------|------------------------------|
| CoP/NF         | 2.37                         |
| NiCoP-1/NF     | 1.53                         |
| NiCoP-2/NF     | 1.24                         |
| NiCoP-3/NF     | 1.21                         |
| NiP/NF         | 0.89                         |

**Table S6.**  $C_{dl}$  values of as-prepared catalysts through the normalization of current density and mass activity, respectively.

| <b>Samples</b> | <b>mF cm<sup>-2</sup></b> | <b>mF/g</b> |
|----------------|---------------------------|-------------|
| CoP/NF         | 94.7                      | 6230.3      |
| NiCoP-1/NF     | 61.1                      | 11880.2     |
| NiCoP-2/NF     | 49.74                     | 7931.8      |
| NiCoP-3/NF     | 48.57                     | 10210.2     |
| NiP/NF         | 35.6                      | 6324.4      |

**Table S7.** ICP data of NiCoP-2/NF solution after 10000 cycles of testing.

| <b>Element</b>           | Ni                      | Co                      | P                         |
|--------------------------|-------------------------|-------------------------|---------------------------|
| <b>Weight Percentage</b> | 0.0068 wt. %            | 0.035 wt. %             | 95.8 wt. %                |
| <b>ICP Content</b>       | 15.0 ug L <sup>-1</sup> | 76.8 ug L <sup>-1</sup> | 2073.7 ug L <sup>-1</sup> |

**Table S8.** Comparison of electrocatalytic activities of HER in 1.0 M KOH between NiCoP-2/NF in this work and various transition metal based catalysts recently reported.

| Materials                               | Current density (mA cm <sup>-2</sup> ) | Potential (mV vs. RHE) | Tafel slope (mV dec <sup>-1</sup> ) | Stability (h) | Reference |
|-----------------------------------------|----------------------------------------|------------------------|-------------------------------------|---------------|-----------|
| NiCoP-2/NF                              | 100<br>500<br>1000                     | 122<br>150<br>169      | 51.6                                | 100           | This work |
| Ni <sub>2(1-x)</sub> Mo <sub>2x</sub> P | 500                                    | 240                    | 46.4                                | 160           | 1         |
| Ni-Co-P/NF                              | 500                                    | 210                    | 46                                  | 24            | 2         |
| A-NiMoO-P                               | 500                                    | 170                    | 87                                  | 1000          | 3         |
| NiMoO <sub>x</sub> /<br>NiMoS           | 500                                    | 174                    | 38                                  | 50            | 4         |
| MoC-Mo <sub>2</sub> C-790               | 500                                    | 292                    | 59                                  | 1000          | 5         |
| MoS <sub>2</sub> /Mo <sub>2</sub> C     | 500                                    | 191                    | 44                                  | 24            | 6         |
| Co-doped CeO <sub>2</sub>               | 500                                    | 215                    | 103.8                               | 14            | 7         |
| Co-NC-AF                                | 500                                    | 272                    | 67.6                                | 32            | 8         |
| NFN-MOF/NF                              | 500                                    | 293                    | 35.2                                | 30            | 9         |
| E-Co SAs                                | 500                                    | 280                    | 105                                 | 500           | 10        |
| Ni-Mo-B HF                              | 500                                    | 329                    | 58.7                                | 300           | 11        |

**Table S9.** The fitted parameters of the EIS data of various NiCoP/NF catalysts.

| Samples    | $\eta(\text{mV})$ | $R_s$ | $CPE_1$   | $R_{ct}$ | $C_\phi(\text{F})$ | $R_i$  | $CPE_2$   | $R_c$  |
|------------|-------------------|-------|-----------|----------|--------------------|--------|-----------|--------|
| CoP/NF     | 60                | 1.522 | 0.002681  | 0.1813   | 0.08815            | 15.19  | 0.0004005 | 1.033  |
|            | 70                | 1.54  | 0.002859  | 0.1938   | 0.07922            | 11.4   | 0.0003987 | 11.07  |
|            | 80                | 1.561 | 0.003031  | 20.03    | 0.07143            | 8.403  | 0.0003769 | 0.1183 |
|            | 90                | 1.509 | 0.004856  | 0.2321   | 0.07026            | 4.813  | 0.0004741 | 1.372  |
|            | 100               | 1.552 | 0.005458  | 0.166    | 0.1368             | 1.814  | 0.09711   | 1.731  |
|            | 110               | 1.412 | 0.0002759 | 15.95    | 0.1752             | 1.401  | 0.07525   | 1.698  |
| NiCoP-1/NF | 60                | 1.468 | 0.00133   | 0.3313   | 0.02364            | 17     | 0.0002515 | 0.0143 |
|            | 70                | 1.455 | 0.01786   | 0.3479   | 0.02154            | 14.74  | 0.0003675 | 0.1483 |
|            | 80                | 1.447 | 0.001797  | 0.3739   | 0.01998            | 11.49  | 0.0002763 | 1.768  |
|            | 90                | 1.504 | 0.002     | 0.407    | 0.0183             | 9.552  | 0.0003439 | 0.0172 |
|            | 100               | 1.442 | 0.00153   | 4.031    | 0.01712            | 6.938  | 0.0002953 | 0.1557 |
|            | 110               | 1.446 | 0.001962  | 4.197    | 0.0158             | 6.077  | 0.0003341 | 0.1699 |
|            | 120               | 1.501 | 0.0001888 | 0.0148   | 0.06637            | 0.869  | 0.01462   | 3.038  |
|            | 130               | 1.461 | 0.0002069 | 16.76    | 0.06004            | 0.7417 | 0.01373   | 3.093  |
| NiCoP-2/NF | 140               | 1.45  | 0.0001821 | 10.53    | 0.1238             | 1.318  | 0.01485   | 2.638  |
|            | 60                | 1.236 | 0.00074   | 3.389    | 0.01381            | 18.63  | 0.0001163 | 0.159  |
|            | 70                | 1.227 | 0.0798    | 0.3938   | 0.01115            | 15.55  | 0.000124  | 0.1633 |
|            | 80                | 1.227 | 0.0007577 | 0.3663   | 0.01017            | 11.72  | 0.001195  | 0.1555 |
|            | 90                | 1.233 | 0.0009303 | 0.4437   | 0.00942            | 10.58  | 0.0001362 | 1.792  |
|            | 100               | 1.238 | 0.0009571 | 0.3944   | 0.00921            | 7.188  | 0.001198  | 0.1744 |
|            | 110               | 1.257 | 0.0000939 | 0.162    | 0.06932            | 2.29   | 0.007784  | 5.225  |
| NiCoP-3/NF | 120               | 1.252 | 0.0000936 | 0.1253   | 1.03               | 3.291  | 0.008612  | 4.236  |
|            | 60                | 1.468 | 0.00133   | 0.3313   | 0.02364            | 17     | 0.0002515 | 0.0143 |
|            | 70                | 1.455 | 0.01786   | 0.3479   | 0.02154            | 14.74  | 0.0003675 | 0.1483 |
|            | 80                | 1.447 | 0.001797  | 0.3739   | 0.01998            | 11.49  | 0.0002763 | 1.768  |
|            | 90                | 1.504 | 0.002     | 0.407    | 0.0183             | 9.552  | 0.0003439 | 0.0172 |
|            | 100               | 1.442 | 0.00153   | 4.031    | 0.01712            | 6.938  | 0.0002953 | 0.1557 |
|            | 110               | 1.446 | 0.001962  | 4.197    | 0.0158             | 6.077  | 0.0003341 | 0.1699 |
|            | 120               | 1.501 | 0.0001888 | 0.0148   | 0.06637            | 0.869  | 0.01462   | 3.038  |
|            | 130               | 1.461 | 0.0002069 | 16.76    | 0.06004            | 0.7417 | 0.01373   | 3.093  |
| NiP/NF     | 140               | 1.45  | 0.0001821 | 10.53    | 0.1238             | 1.318  | 0.01485   | 2.638  |
|            | 60                | 2.018 | 0.0006935 | 0.4838   | 0.00945            | 29.39  | 0.0001325 | 0.2264 |
|            | 70                | 1.971 | 0.00068   | 5.082    | 0.00828            | 25.97  | 0.0001072 | 0.2354 |
|            | 80                | 2.037 | 0.000142  | 0.0230   | 0.00835            | 24.51  | 0.001177  | 0.3027 |
|            | 90                | 2.028 | 0.0001264 | 2.158    | 0.00873            | 22.75  | 0.00109   | 0.2947 |
|            | 100               | 1.92  | 0.0006831 | 0.6051   | 0.00728            | 16.7   | 0.0001152 | 2.494  |
|            | 110               | 2.008 | 0.0004933 | 0.4984   | 0.00758            | 16.39  | 0.0000096 | 0.1831 |
|            | 120               | 1.907 | 0.006062  | 4.804    | 0.00712            | 12.06  | 0.0001191 | 0.2291 |
|            | 130               | 1.952 | 0.0001184 | 0.1882   | 0.1699             | 10.39  | 0.006112  | 7.804  |
| NiP/NF     | 140               | 1.964 | 0.001129  | 0.0615   | 0.2618             | 23.65  | 0.00574   | 6.091  |

## References

1. Yu, L.; Mishra, I. K.; Xie, Y.; Zhou, H.; Sun, J.; Zhou, J.; Ni, Y.; Luo, D.; Yu, F.; Yu, Y.; Chen, S.; Ren, Z., Ternary  $\text{Ni}_{2(1-x)}\text{Mo}_x\text{P}$  nanowire arrays toward efficient and stable hydrogen evolution electrocatalysis under large-current-density. *Nano Energy* **2018**, *53*, 492-500.
2. Yu, C.; Xu, F.; Luo, L.; Abbo, H. S.; Titinchi, S. J. J.; Shen, P. K.; Tsiakaras, P.; Yin, S., Bimetallic Ni-Co phosphide nanosheets self-supported on nickel foam as high-performance electrocatalyst for hydrogen evolution reaction. *Electrochimica Acta* **2019**, *317*, 191-198.
3. Li, Q.; Chen, C.; Luo, W.; Yu, X.; Chang, Z.; Kong, F.; Zhu, L.; Huang, Y.; Tian, H.; Cui, X.; Shi, J., In situ active site refreshing of electro-catalytic materials for ultra-durable hydrogen evolution at elevated current density. *Advanced Energy Materials* **2024**, 1614-6832.
4. Zhai, P.; Zhang, Y.; Wu, Y.; Gao, J.; Zhang, B.; Cao, S.; Zhang, Y.; Li, Z.; Sun, L.; Hou, J., Engineering active sites on hierarchical transition bimetal oxides/sulfides heterostructure array enabling robust overall water splitting. *Nature Communications* **2020**, *11* (1), 5462.
5. Liu, W.; Wang, X.; Wang, F.; Du, K.; Zhang, Z.; Guo, Y.; Yin, H.; Wang, D., A durable and pH-universal self-standing MoC-Mo<sub>2</sub>C heterojunction electrode for efficient hydrogen evolution reaction. *Nature Communications* **2021**, *12* (1), 6776.
6. Luo, Y.; Tang, L.; Khan, U.; Yu, Q.; Cheng, H.-M.; Zou, X.; Liu, B., Morphology and surface chemistry engineering toward pH-universal catalysts for hydrogen evolution at high current density. *Nature Communications* **2019**, *10* (1), 269.
7. Jiang, S.; Zhang, R.; Liu, H.; Rao, Y.; Yu, Y.; Chen, S.; Yue, Q.; Zhang, Y.; Kang, Y., Promoting formation of oxygen vacancies in two-dimensional cobalt-doped ceria nanosheets for efficient hydrogen evolution. *Journal of the American Chemical Society* **2020**, *142* (14), 6461-6466.
8. Liu, R.; Gong, Z.; Liu, J.; Dong, J.; Liao, J.; Liu, H.; Huang, H.; Liu, J.; Yan, M.; Huang, K.; Gong, H.; Zhu, J.; Cui, C.; Ye, G.; Fei, H., Design of aligned porous carbon films with single-atom Co-N-C sites for high-current-density hydrogen generation. *Advanced Materials* **2021**, *33* (41), 2103533.
9. Senthil Raja, D.; Chuah, X. F.; Lu, S. Y., In situ grown bimetallic mof-based composite as highly efficient bifunctional electrocatalyst for overall water splitting with ultrastability at high current densities. *Advanced Energy Materials* **2018**, *8* (23), 1801065.
10. Liu, X.; Zheng, L.; Han, C.; Zong, H.; Yang, G.; Lin, S.; Kumar, A.; Jadhav, A. R.; Tran, N. Q.; Hwang, Y.; Lee, J.; Vasimalla, S.; Chen, Z.; Kim, S. G.; Lee, H., Identifying the activity origin of a cobalt single-atom catalyst for hydrogen evolution using supervised learning. *Advanced Functional Materials* **2021**, *31* (18), 2100547.
11. Liu, H.; Li, X.; Chen, L.; Zhu, X.; Dong, P.; Chee, M. O. L.; Ye, M.; Guo, Y.; Shen, J., Monolithic Ni-Mo-B bifunctional electrode for large current water splitting. *Advanced Functional Materials* **2021**, *32* (4), 2107308.
